# Supplementary material for: Modulation of sensitivity to mechanical stimulus in mechanofluorochromic properties by altering substituent positions in solid-state emissive diiodo boron diiminates
Source: Royal Society of Chemistry journal article supplement (doi:10.1039/c6tc01111j), 2016-01-01
Supplement: c6tc01111j1.pdf [file c6tc01111j1.pdf]

***Supporting Information***

Modulation of Sensitivity to Mechanical Stimulus in  
Mechanofluorochromic Properties by Altering Substituent  
Positions in Solid-State Emissive Diiodo Boron Diiminates

*Madoka Yamaguchi, Ito Shunichiro, Amane Hirose, Kazuo Tanaka\*, and Yoshiki  
Chujo\**

*Department of Polymer Chemistry, Graduate School of Engineering, Kyoto University,  
Katsura, Nishikyo-ku, Kyoto 615-8510, Japan*

*E-mail: kazuo123@chujo.synchem.kyoto-u.ac.jp; chujo@chujo.synchem.kyoto-u.ac.jp*

## Experimental Section

**Measurements:**  $^1\text{H}$  (400 MHz),  $^{13}\text{C}$  (100 MHz), and  $^{11}\text{B}$  (128 MHz) NMR spectra were recorded on JEOL JNM-EX400 spectrometers. In  $^1\text{H}$  and  $^{13}\text{C}$  NMR spectra, tetramethylsilane (TMS) was used as an internal standard in  $\text{CDCl}_3$ , and  $^{11}\text{B}$  NMR spectra were referenced externally to  $\text{BF}_3\cdot\text{OEt}_2$  (sealed capillary).  $^{19}\text{F}$  (376 MHz) NMR spectra were recorded on JEOL JNM-ECX400P spectrometer. Ethyl trifluoroacetate ( $\delta = -78$  ppm) was used as an internal standard. Thermogravimetric analyses (TGA) were performed on an EXSTAR TG/DTA6220, Seiko Instrument, Inc., with the heating rate of  $10$  °C/min under nitrogen flowing (200 mL/min). UV–vis spectra were recorded on a SHIMADZU UV-3600 spectrophotometer. Fluorescence emission spectra were measured with a HORIBA JOBIN YVON Fluoromax-4P spectrofluorometer. Absolute PL quantum efficiencies ( $\Phi_{\text{PL}}$ ) were determined using a Horiba FL-3018 Integrating Sphere with the minimum detection limit at 0.01. Powder X-ray diffraction (XRD) patterns were taken by using  $\text{CuK}\alpha$  radiation with a Rigaku Miniflex. X-ray crystallographic analysis was carried out by a Rigaku R-AXIS RAPID-F graphite-monochromated  $\text{Mo K}\alpha$  radiation diffractometer with an imaging plate. A symmetry-related absorption correction was carried out by using the program ABSCOR. The analysis was carried out with direct methods (SHELX97 or SIR92) using Yadokari-XG. The program ORTEP35 was used to generate the X-ray structural diagram. Differential scanning calorimetry (DSC) thermograms were carried out on a SII DSC 6220 instrument. The sample on the aluminum pan was heated at the rate of  $10$  °C/min under nitrogen flowing (30 mL/min).

**Materials:** Aniline (Wako Chemical, Co.), *p*-iodoaniline (Tokyo Kasei Kogyo, Co.), benzoyl chloride (Tokyo Kasei Kogyo, Co.), *p*-iodobenzoyl chloride (Tokyo Kasei Kogyo, Co.), acetophenone (Tokyo Kasei Kogyo, Co.), *p*-iodoacetophenone (Tokyo Kasei Kogyo, Co.), acetic acid (Wako Chemical, Co.), pyridine (Wako Chemical, Co.), thionyl chloride (Wako Chemical, Co.), phosphorus pentachloride (Tokyo Kasei Kogyo, Co.), lithium diisopropylamide 3S (1 mol/L in mixed solvent of hexane and THF, Kanto Chemical, Co., Inc.) and boron trifluoride diethyl etherate ( $\text{BF}_3\cdot\text{OEt}_2$ , Aldrich Chemical,

Co.) were used as received. Tetrahydrofuran (THF) and triethylamine were purified using a two-column solid-state purification system (Glasscoutour System, Joerg Meyer, Irvine, CA).

**Scheme S1. Synthesis of boron diiminates**

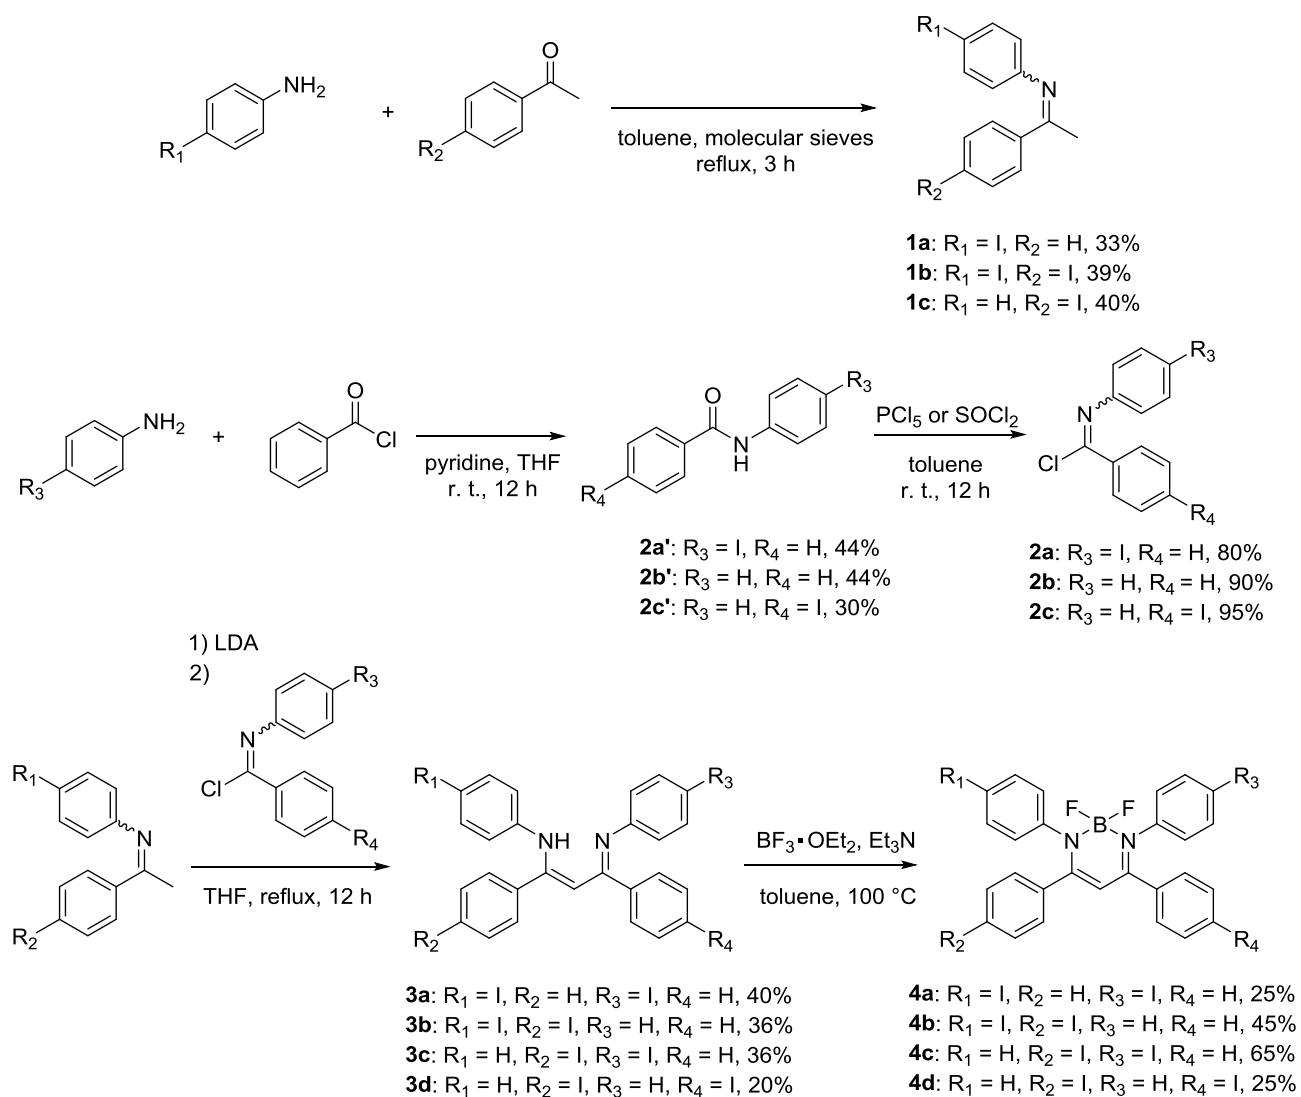

### **Synthesis of 1a**

*p*-Iodoaniline (25 g, 114 mmol) and molecular sieve were added to the solution of acetophenone (13.7 g, 13.3 mL, 114 mmol) in toluene (175 mL). The reaction mixture was stirred under argon atmosphere at reflux temperature for 3 h. After the sieves were removed by filtration, the solvent was removed by a rotary evaporator. The product was purified by recrystallization from methanol. The precipitate collected by filtration was dried in vacuum to give pure **1a** as a yellow crystal (12.4 g, 33%). <sup>1</sup>H NMR (CDCl<sub>3</sub>): δ = 7.95 (2H, d, *J* = 6.71 Hz, Ar-*H*), 7.64 (2H, d, *J* = 8.30 Hz, Ar-*H*), 7.48–7.43 (3H, dd, *J* = 13.98 Hz, 6.47 Hz, Ar-*H*), 6.57 (2H, t, *J* = 8.12 Hz, Ar-*H*), 2.23 (3H, s, -CH<sub>3</sub>) ppm. <sup>13</sup>C NMR (CDCl<sub>3</sub>): δ = 166.03, 151.39, 139.22, 137.93, 130.69, 128.40, 127.20, 121.66, 86.57, 17.39 ppm. HRMS (ESI): Calcd for [M+H]<sup>+</sup>, 322.0084; found, *m/z* 322.0087.

### **Synthesis of 1b**

*p*-Iodoaniline (11.5 g, 52.5 mmol) and molecular sieves and *p*-iodoacetophenone (12.9 g, 52.5 mmol) and acetic acid (5 mL) were added in toluene (150 mL). The reaction mixture was stirred under argon atmosphere at reflux temperature for 3 h. After the sieves were removed by filtration, the solvent was removed by a rotary evaporator. The obtained product was washed with methanol, and the solid collected by filtration was dried in vacuum to give pure **1b** as a yellow powder (9.2 g, 39%). <sup>1</sup>H NMR (CDCl<sub>3</sub>): δ = 7.79 (2H, d, *J* = 8.36 Hz, Ar-*H*), 7.69–7.64 (4H, Ar-*H*), 6.55 (2H, d, *J* = 8.30 Hz, Ar-*H*), 2.19 (3H, s, -CH<sub>3</sub>) ppm. <sup>13</sup>C NMR (CDCl<sub>3</sub>): δ = 165.14, 151.00, 138.60, 137.98, 137.60, 128.87, 121.54, 97.58, 86.88, 17.13 ppm. HRMS (ESI): Calcd for [M+H]<sup>+</sup>, 447.9054; found, *m/z* 447.9051.

### **Synthesis of 1c**

Compound **1c** was prepared from aniline (7.5 g, 7.35 mL, 80.53 mmol) and *p*-iodoacetophenone (19.8 g, 80.5 mmol) in 40% yield (10.4 g, pale yellow solid) according to the same method with **1a**. <sup>1</sup>H NMR (CDCl<sub>3</sub>): δ = 7.75 (4H, dd, *J* = 34.8 Hz, 8.61 Hz, Ar-*H*), 7.35 (2H, t, *J* = 15.7 Hz, Ar-*H*), 7.09 (1H, t, 14.9 Hz, Ar-*H*), 6.78 (2H, d, *J* = 7.14 Hz, Ar-*H*), 2.20 (3H, s, -CH<sub>3</sub>) ppm. <sup>13</sup>C NMR (CDCl<sub>3</sub>): δ = 164.47, 151.38, 138.98, 137.52, 128.97, 128.86, 123.41, 119.25, 97.21, 17.06 ppm.

HRMS (ESI): Calcd for  $[M+H]^+$ , 322.0087; found,  $m/z$  322.0085.

### Synthesis of 2a'

Benzoyl chloride (19.3 g, 15.9 mL, 137 mmol) and pyridine (10.8 g, 11.1 mL, 137 mmol) were added to *p*-iodoaniline (20.0 g, 91.3 mmol) in THF (180 mL). The reaction mixture was stirred under argon at ambient temperature for 12 h. After the generated salt was removed by filtration, the solvent was removed by a rotary evaporator. The obtained product was washed with methanol, and the solid collected by filtration was dried in vacuum to give pure **2a'** as a white solid (13.2 g, 44%).  $^1\text{H}$  NMR ( $\text{CDCl}_3$ ):  $\delta$  = 7.86 (2H, d,  $J$  = 7.35 Hz, Ar-*H*), 7.75 (1H, br s, -NH-), 7.68 (2H, d,  $J$  = 8.79 Hz, Ar-*H*), 7.57 (1H, t,  $J$  = 14.5, Ar-*H*), 7.50 (2H, t,  $J$  = 15.2, Ar-*H*), 7.44 (2H, d,  $J$  = 8.48 Hz, Ar-*H*) ppm. Because of poor solubility,  $^{13}\text{C}$  NMR spectrum was not detectable. HRMS (ESI): Calcd for  $[M+H]^+$ , 323.9880; found,  $m/z$  323.9877.

### Synthesis of 2b'

Compound **2b'** was prepared from aniline (10.0 g, 9.8 mL, 107 mmol) and benzoyl chloride (2.6 g, 18.8 mmol) in 44% yield (9.3 g, white solid) according to the same method with **2a'**.  $^1\text{H}$  NMR ( $\text{CDCl}_3$ ):  $\delta$  = 7.87 (2H, d,  $J$  = 7.87 Hz, Ar-*H*), 7.79 (1H, br s, -NH-), 7.65 (2H, d,  $J$  = 8.06 Hz, Ar-*H*), 7.58-7.48 (3H, Ar-*H*), 7.38 (2H, t,  $J$  = 14.5 Hz, Ar-*H*), 7.16 (1H, t,  $J$  = 14.6 Hz, Ar-*H*) ppm.  $^{13}\text{C}$  NMR ( $\text{CDCl}_3$ ):  $\delta$  = 165.69, 137.97, 135.10, 131.82, 129.11, 128.81, 127.01, 124.59, 120.22 ppm. HRMS (ESI): Calcd for  $[M+H]^+$ , 198.0913; found,  $m/z$  198.0914.

### Synthesis of 2c'

Compound **2c'** was prepared from aniline (8.75 g, 8.58 mL, 94.0 mmol) and *p*-iodobenzoyl chloride (25.0 g, 94.0 mmol) in 30% yield (3.0 g, pale yellow solid) according to the same method with **2a'**.  $^1\text{H}$  NMR ( $\text{CDCl}_3$ ):  $\delta$  = 7.85 (2H, d,  $J$  = 8.42 Hz, Ar-*H*), 7.72 (1H, br s, -NH-), 7.61 (4H, dd,  $J$  = 17.1 Hz, 8.61 Hz, Ar-*H*), 7.38 (2H, t,  $J$  = 15.9 Hz, Ar-*H*), 7.17 (1H, t,  $J$  = 15.0 Hz, Ar-*H*) ppm. Because of

poor solubility,  $^{13}\text{C}$  NMR spectrum was not detectable. HRMS (ESI): Calcd for  $[\text{M-H}]^-$ , 321.9734; found,  $m/z$  321.9732.

### **Synthesis of 2a**

Phosphorus pentachloride (6.4 g, 30.6 mmol) was added to the solution of **2a'** (9.0 g, 27.9 mmol) in toluene (100 mL). The reaction mixture was stirred under argon atmosphere at reflux temperature for 12 h. After the solution was cooled to ambient temperature, the solvent was removed by vacuum distillation. Sodium hydrogen carbonate was added to the residue for neutralization. Precipitates were removed by filtration, and then the solvent was removed by a rotary evaporator to give the desired product **2a** as a pale yellow solid (7.7 g, 80%). The product was used for the next reaction without further purification.

### **Synthesis of 2b**

Thionyl chloride (42.2 g, 25.7 mL, 0.35 mol) was added to the solution of **2b'** (10.0 g, 42.2 mmol) in toluene (150 mL). The reaction mixture was stirred under argon atmosphere at reflux temperature for 12 h. After the solution was cooled to ambient temperature, the solvent and the remaining thionyl chloride were removed by vacuum distillation. Sodium hydrogen carbonate and toluene were added to the residue for neutralization. Precipitates were removed by filtration, and then the solvent was removed by a rotary evaporator to give the desired product **2b** as a pale yellow solid (9.9 g, 90%). The product was used for the next reaction without further purification.

### **Synthesis of 2c**

Compound **2c** was prepared from **2c'** (2.5 g, 7.7 mmol) in 95% yield (2.5 g, pale yellow solid) according to the same method with **2b**.

### **Synthesis of 3a**

Lithium diisopropylamide (10.9 mL, 11.9 mmol) was added dropwise to the solution of **1a** (3.5 g,

10.9 mmol) in THF (75 mL) at  $-10\text{ }^{\circ}\text{C}$ . The reaction mixture was stirred at  $-10\text{ }^{\circ}\text{C}$  for 30 min under argon atmosphere, and then **2a** (3.72 g, 10.9 mmol) in THF (75 mL) was added to the reaction solution at  $-10\text{ }^{\circ}\text{C}$ . After stirred the solution at reflux temperature for 12 h, the solution was poured into a large amount of  $\text{CH}_2\text{Cl}_2$ . The solution was washed with brine three times and dried over anhydrous magnesium sulfate. After the solvent was removed by a rotary evaporator, the obtained product was dissolved in a small amount of  $\text{CHCl}_3$ , and then the product was reprecipitated from methanol. The precipitate collected by filtration was dried in vacuum to give pure **3a** as a yellow powder. (2.92 g, 40%).  $^1\text{H}$  NMR ( $\text{CDCl}_3$ ):  $\delta = 12.9$  (1H, s,  $-\text{NH}-$ ), 7.39 (4H, d,  $J = 8.42$  Hz, Ar- $H$ ), 7.32–7.27 (12H, Ar- $H$ ), 6.48 (4H, d,  $J = 8.42$  Hz), 5.38 (1H, s,  $-\text{CH}=\text{}$ ) ppm. HRMS (ESI): Calcd for  $[\text{M}+\text{H}]^+$ , 626.9789; found,  $m/z$  626.9777.

### Synthesis of 3b

Compound **3b** was prepared from **1b** (2.5 g, 5.6 mmol) and **3b** (1.2 g, 5.6 mmol) in 36% yield (1.1 g, a yellow powder) according to the same method with **3a**.  $^1\text{H}$  NMR ( $\text{CDCl}_3$ ):  $\delta = 12.9$  (1H, s,  $-\text{NH}-$ ), 7.36–7.26 (10H, Ar- $H$ ), 7.62 (2H, d,  $J = 8.24$  Hz, Ar- $H$ ), 7.42 (2H, d,  $J = 8.36$  Hz, Ar- $H$ ), 7.33–7.28 (6H, Ar- $H$ ), 7.11 (2H, t,  $J = 15.3$  Hz, Ar- $H$ ), 7.03 (2H, d,  $J = 8.18$  Hz, Ar- $H$ ), 6.92 (1H, t,  $J = 15.1$  Hz, Ar- $H$ ), 5.31 (1H, s,  $-\text{CH}=\text{}$ ) ppm. HRMS (ESI): Calcd for  $[\text{M}+\text{H}]^+$ , 626.9789; found,  $m/z$  626.9776.

### Synthesis of 3c

Compound **3c** was prepared from **1c** (3.5 g, 10.9 mmol) and **2a** (3.7 g, 10.9 mmol) in 36% yield (3.2 g, a yellow powder) according to the same method with **3a**.  $^1\text{H}$  NMR ( $\text{CDCl}_3$ ):  $\delta = 12.9$  (1H, s,  $-\text{NH}-$ ), 7.60 (2H, d,  $J = 8.24$  Hz, Ar- $H$ ), 7.38 (2H, d,  $J = 8.48$  Hz, Ar- $H$ ), 7.32–7.27 (5H, Ar- $H$ ), 7.14 (2H, t,  $J = 15.8$  Hz, Ar- $H$ ), 7.07 (2H, d,  $J = 8.30$  Hz, Ar- $H$ ), 6.94 (1H, t,  $J = 14.5$  Hz, Ar- $H$ ), 6.72 (2H, d,  $J = 7.51$  Hz, Ar- $H$ ), 6.48 (2H, d,  $J = 8.42$  Hz, Ar- $H$ ), 5.32 (1H, s,  $-\text{CH}=\text{}$ ) ppm. HRMS (ESI): Calcd for  $[\text{M}+\text{H}]^+$ , 626.9789; found,  $m/z$  626.9777.

### Synthesis of 3d



Lithium diisopropylamide (9.34 mL, 10.3 mmol) was added dropwise to the solution of **1c** (3.0 g, 9.3 mmol) in THF (75 mL) at  $-10\text{ }^{\circ}\text{C}$ . The reaction mixture was stirred at  $-10\text{ }^{\circ}\text{C}$  for 30 minutes under argon atmosphere, and then **3c** (3.1 g, 9.3 mmol) in THF (75 mL) was added to the solution at  $-10\text{ }^{\circ}\text{C}$ . After stirred the solution at ambient temperature for 12 h, the solution was poured into a large amount of  $\text{CH}_2\text{Cl}_2$ . The solution was washed with brine three times and dried over anhydrous magnesium sulfate. After the solvent was removed by a rotary evaporator, the obtained product was dissolved in a small amount of  $\text{CHCl}_3$ , and then the product was reprecipitated from methanol. The precipitate collected by filtration was dried in vacuum to the desired product of **3d** as an orange powder. The product was used for next reaction without further purification because of extremely low stability (0.25 g, 20%).

### **Synthesis of 4a**

$\text{BF}_3\cdot\text{OEt}_2$  (3.0 mL, 3.4 g, 24.0 mmol) and triethylamine (3.3 mL, 2.4 g, 24.0 mmol) were added to the solution of **3a** (1.5 g, 2.4 mmol) in toluene (60 mL) at ambient temperature, and the solution was stirred at  $100\text{ }^{\circ}\text{C}$  for 6 h. After precipitates were removed by filtration, the solvent was removed by a rotary evaporator. The obtained product was dissolved in a small amount of  $\text{CHCl}_3$ , and then the product was reprecipitated from methanol. After the precipitate collected by filtration was dried in vacuum the product was purified by silica gel column chromatography (eluted with hexane/ethyl acetate = 2.5/1). The product was purified by recrystallization from methanol. The precipitate collected by filtration was dried in vacuum to give pure **4a** as a yellow crystal (0.4 g, 25%).  $^1\text{H}$  NMR ( $\text{CDCl}_3$ ):  $\delta = 7.48$  (4H, tt,  $J = 8.65$  Hz, 4.51 Hz, Ar-*H*), 7.33–7.23 (10H, Ar-*H*), 6.91 (4H, d,  $J = 8.53$  Hz), 5.64 (1H, s, -*CH=*) ppm.  $^{13}\text{C}$  NMR ( $\text{CDCl}_3$ ):  $\delta = 164.60, 141.47, 137.52, 135.96, 129.84, 129.65, 129.02, 128.41, 100.11, 91.53$  ppm.  $^{11}\text{B}$  NMR ( $\text{CDCl}_3$ ):  $\delta = 1.56$  (t,  $J = 37.5$  Hz) ppm.  $^{19}\text{F}$  NMR ( $\text{CDCl}_3$ ):  $\delta = -130.3$  (q,  $J = 34.6$  Hz) ppm. HRMS (ESI): Calcd for  $[\text{M}+\text{Na}]^+$ , 696.9591; found,  $m/z$  696.9583.

### **Synthesis of 4b**

$\text{BF}_3\cdot\text{OEt}_2$  (3.0 mL, 3.4 g, 24.0 mmol) and triethylamine (3.3 mL, 2.4 g, 24.0 mmol) were added to

the solution of **3b** (1.5 g, 2.4 mmol) in toluene (60 mL) at ambient temperature, and the solution was stirred at 100 °C for 6 h. After precipitates were removed by filtration, the solvent was removed by a rotary evaporator. The obtained product was dissolved in a small amount of CHCl<sub>3</sub>, and then the product was reprecipitated from methanol. After the precipitate collected by filtration was dried in vacuum, the product was purified by recrystallization from methanol. The precipitate collected by filtration was dried in vacuum to give pure **4b** as a yellow crystal (0.7 g, 45%) . <sup>1</sup>H NMR (CDCl<sub>3</sub>): δ = 7.61 (2H, d, *J* = 8.22 Hz, Ar-*H*), 7.50 (2H, d, *J* = 7.92 Hz, Ar-*H*), 7.28–7.08 (10H, Ar-*H*), 7.03 (2H, d, *J* = 7.92 Hz, Ar-*H*), 6.92 (2H, d, *J* = 8.53 Hz, Ar-*H*), 5.58 (1H, s, -CH=) ppm. <sup>13</sup>C NMR (CDCl<sub>3</sub>): δ = 165.21, 162.79, 141.41, 141.40, 137.68, 137.64, 136.09, 135.63, 130.60, 129.66, 129.61, 128.98, 128.37, 128.20, 127.70, 126.60, 99.63, 96.30, 91.96 ppm. <sup>11</sup>B NMR (CDCl<sub>3</sub>): δ = 1.56 (t, *J* = 25.1 Hz) ppm. <sup>19</sup>F NMR (CDCl<sub>3</sub>): δ = -130.3 (q, *J* = 24.4 Hz) ppm. HRMS (ESI): Calcd for [M+Na]<sup>+</sup>, 696.9591; found, m/z 696.9582.

### **Synthesis of 4c**

Compound **4c** was prepared from **3c** (1.7 g, 2.6 mmol) in 65% yield (3.2 g, a yellow powder) according to the same method with **4b**. <sup>1</sup>H NMR (CDCl<sub>3</sub>): δ = 7.57 (4H, tt, *J* = 8.53 Hz, 4.02 Hz, Ar-*H*), 7.33–7.11 (10H, Ar-*H*), 7.03 (2H, tt, *J* = 8.53 Hz, 3.84 Hz, Ar-*H*), 6.91 (2H, d, *J* = 8.65 Hz, Ar-*H*) 5.57 (1H, s, -CH=) ppm. <sup>13</sup>C NMR (CDCl<sub>3</sub>): δ = 164.44, 163.66, 141.53, 141.33, 137.48, 137.44, 135.98, 135.77, 130.59, 129.81, 129.66, 129.00, 128.56, 128.40, 127.69, 126.70, 99.56, 96.10, 91.45 ppm. <sup>11</sup>B NMR (CDCl<sub>3</sub>): δ = 1.56 (t, *J* = 25.0 Hz) ppm. <sup>19</sup>F NMR (CDCl<sub>3</sub>): δ = -130.3 (q, *J* = 24.4 Hz) ppm. HRMS (ESI): Calcd for [M+Na]<sup>+</sup>, 696.9591; found, m/z 696.9581.

### **Synthesis of 4d**

BF<sub>3</sub>•OEt<sub>2</sub> (4.9 mL, 5.7 g, 39.9 mmol) and triethylamine (5.6 mL, 4.0 g, 39.9 mmol) were added to the solution of **3c** (2.5 g, 4.0 mmol) in toluene (60 mL) at ambient temperature, and the solution was stirred at 100 °C for 6 h. After precipitates were removed by filtration, the solvent was removed by a rotary evaporator. The obtained product was dissolved in a small amount of CHCl<sub>3</sub>, and then the

product was reprecipitated from methanol. After the precipitate collected by filtration was dried in vacuum the product was purified by silica gel column chromatography (eluted with hexane/ethyl acetate = 5/1). The product was purified by recrystallization from methanol. The precipitate collected by filtration was dried in vacuum to give pure **4d** as a yellow crystal (0.4 g, 25%).  $^1\text{H}$  NMR ( $\text{CDCl}_3$ ):  $\delta = 7.58$  (4H, tt,  $J = 8.30$  Hz, 4.09 Hz, Ar-*H*), 7.21–7.11 (10H, Ar-*H*), 7.02 (4H, tt,  $J = 8.42$  Hz, 4.09 Hz, Ar-*H*), 5.52 (1H, s, -CH=) ppm.  $^{13}\text{C}$  NMR ( $\text{CDCl}_3$ ):  $\delta = 163.48, 141.36, 137.43, 135.79, 130.59, 128.52, 127.69, 126.65, 98.94, 96.09$  ppm.  $^{11}\text{B}$  NMR ( $\text{CDCl}_3$ ):  $\delta = 1.66$  (t,  $J = 25.1$  Hz) ppm.  $^{19}\text{F}$  NMR ( $\text{CDCl}_3$ ):  $\delta = -130.4$  (q,  $J = 28.6$  Hz) ppm. HRMS (ESI): Calcd for  $[\text{M}+\text{H}]^+$ , 674.9771; found,  $m/z$  674.9767.

(a)

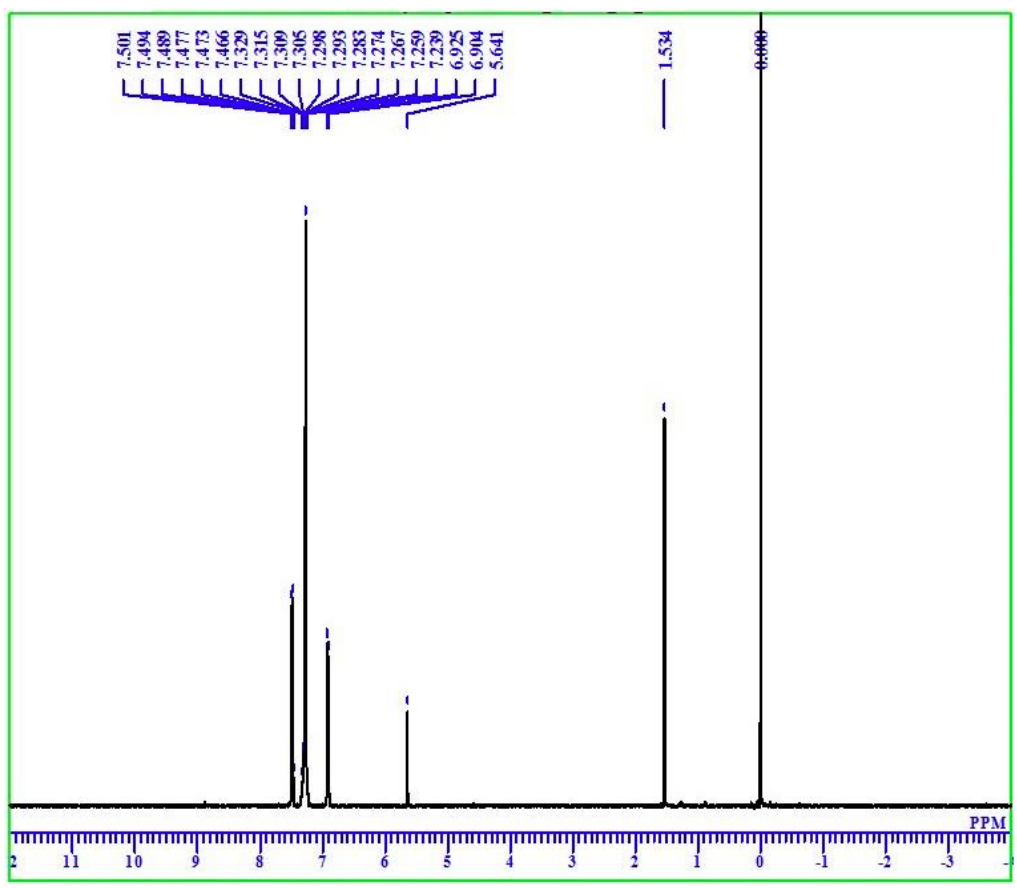

(b)

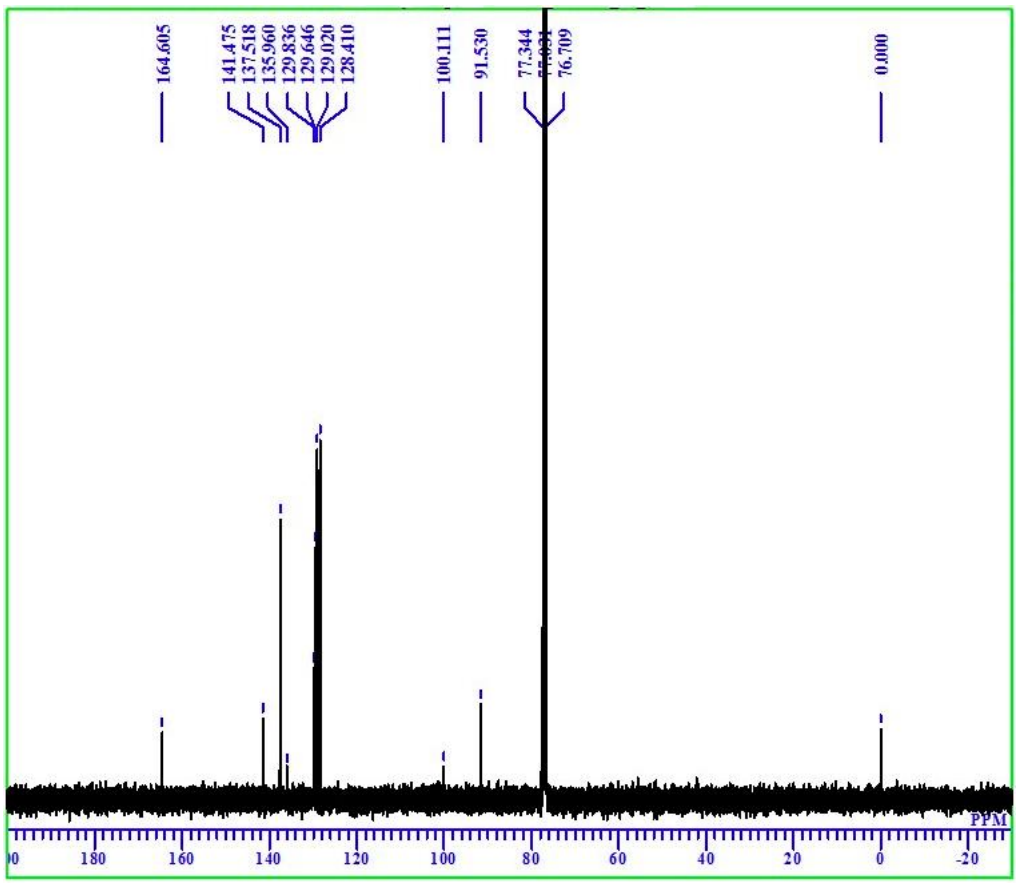

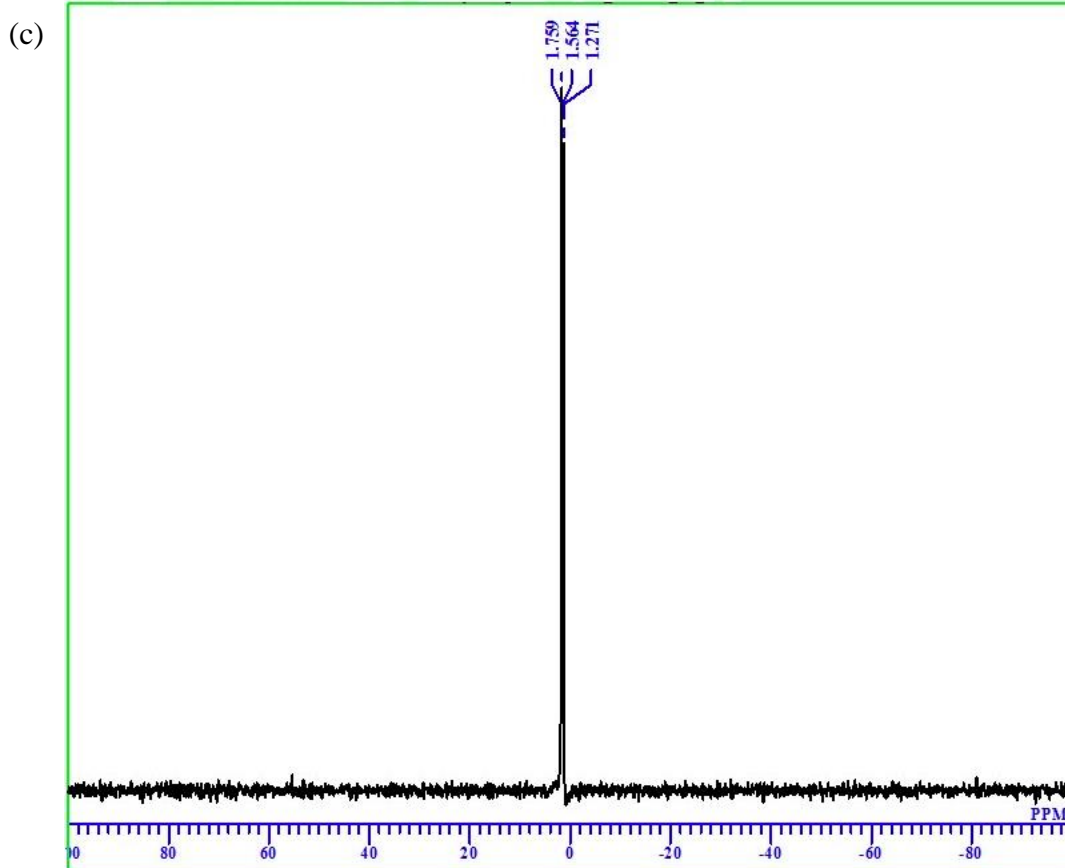

(d)

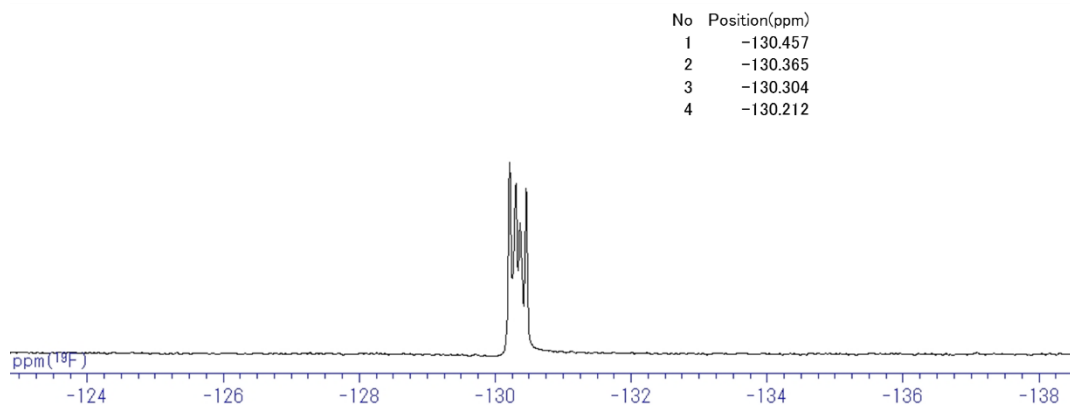

**Figure S1.** (a)  $^1\text{H}$ , (b)  $^{13}\text{C}$ , (c)  $^{11}\text{B}$  and (d)  $^{19}\text{F}$  NMR spectra of **4a** in  $\text{CDCl}_3$ .

(a)

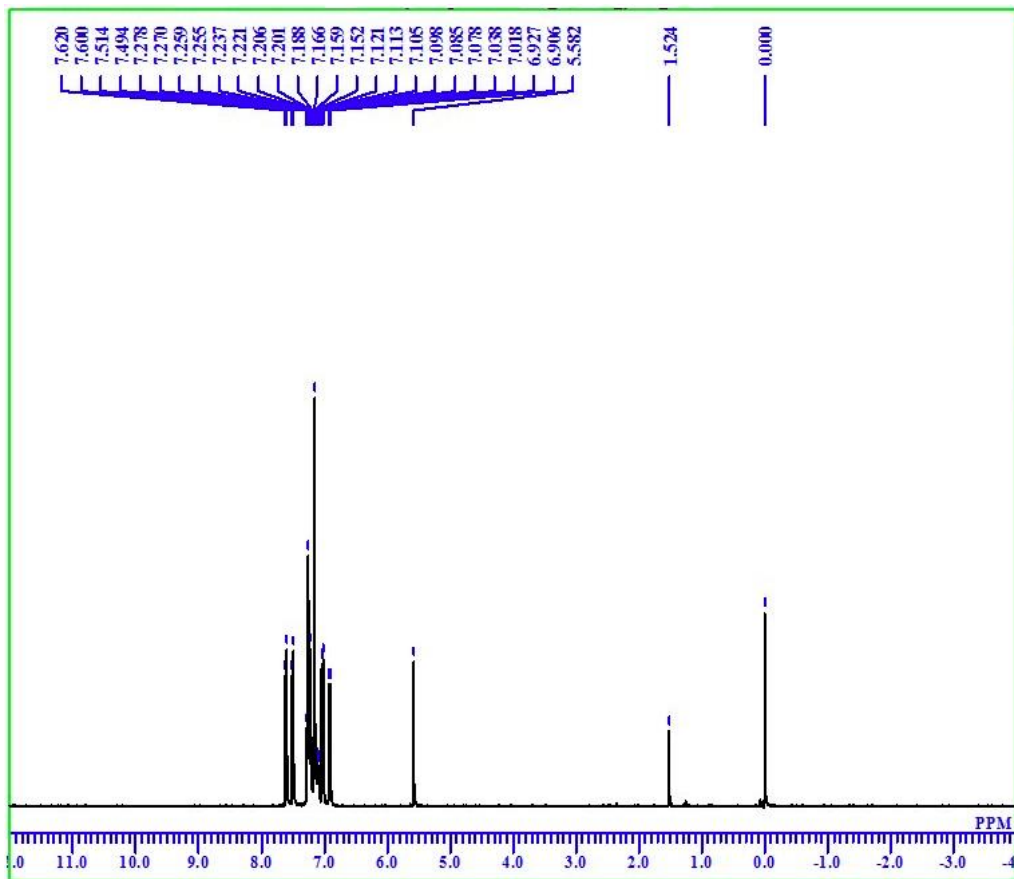

(b)

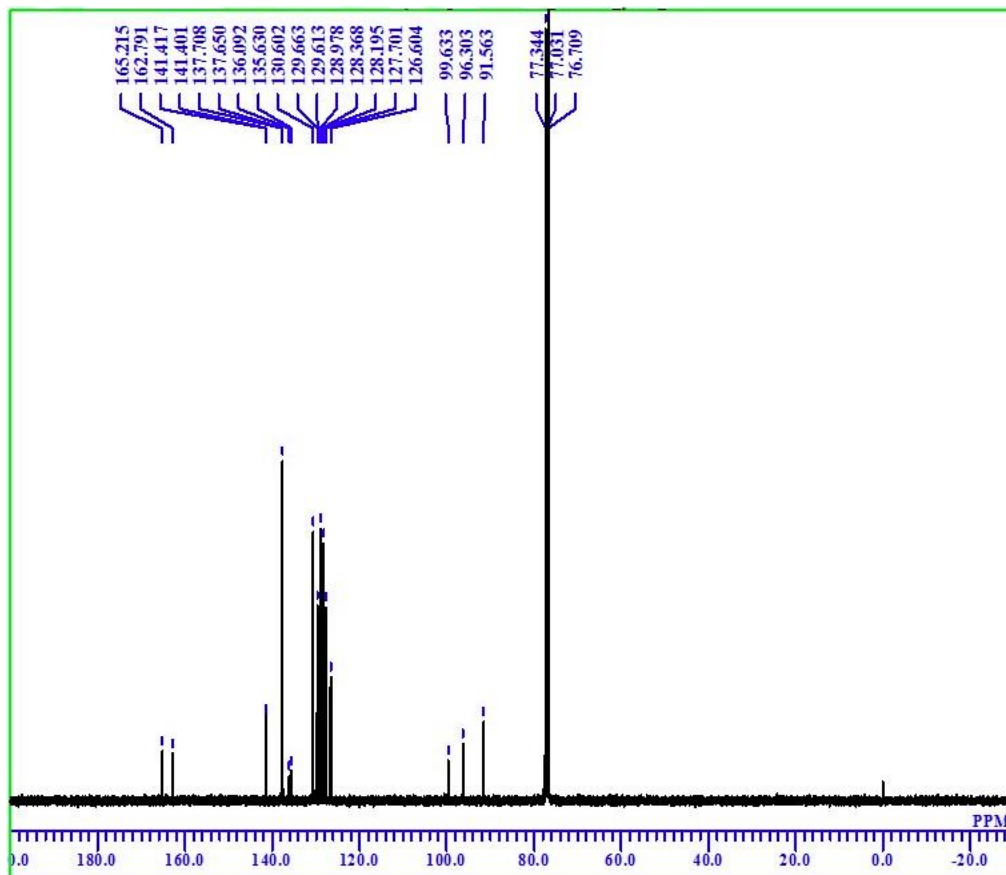

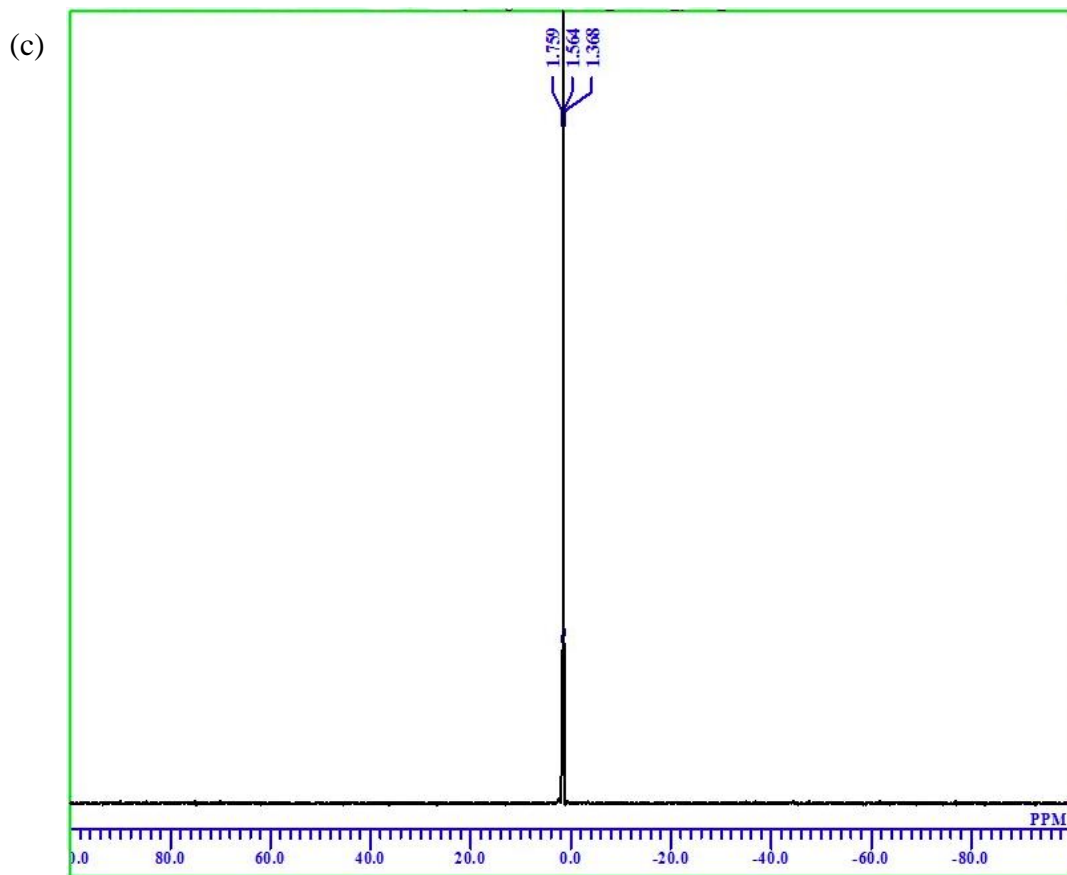

(d)

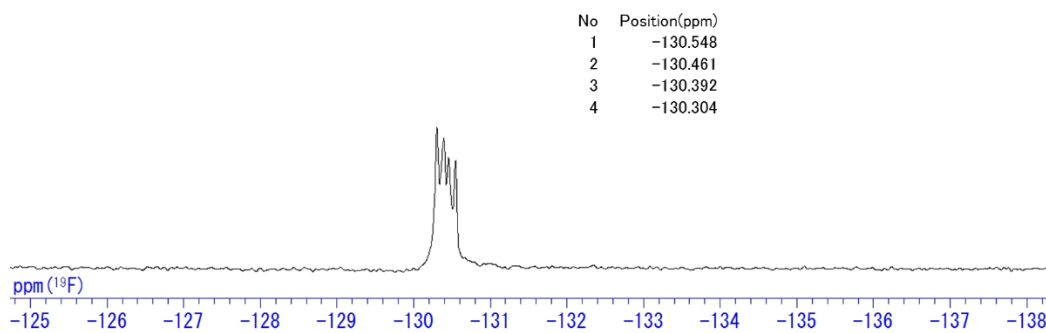

**Figure S2.** (a) <sup>1</sup>H, (b) <sup>13</sup>C, (c) <sup>11</sup>B and (d) <sup>19</sup>F NMR spectra of **4b** in CDCl<sub>3</sub>.

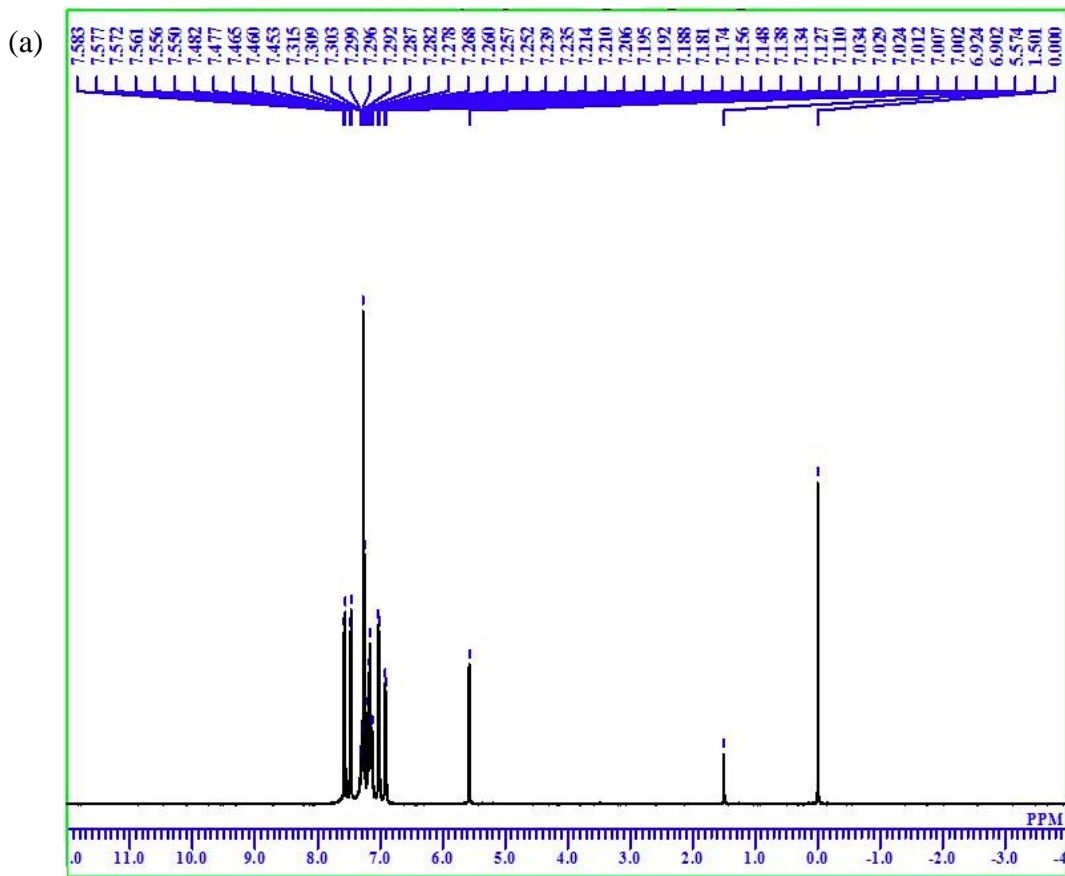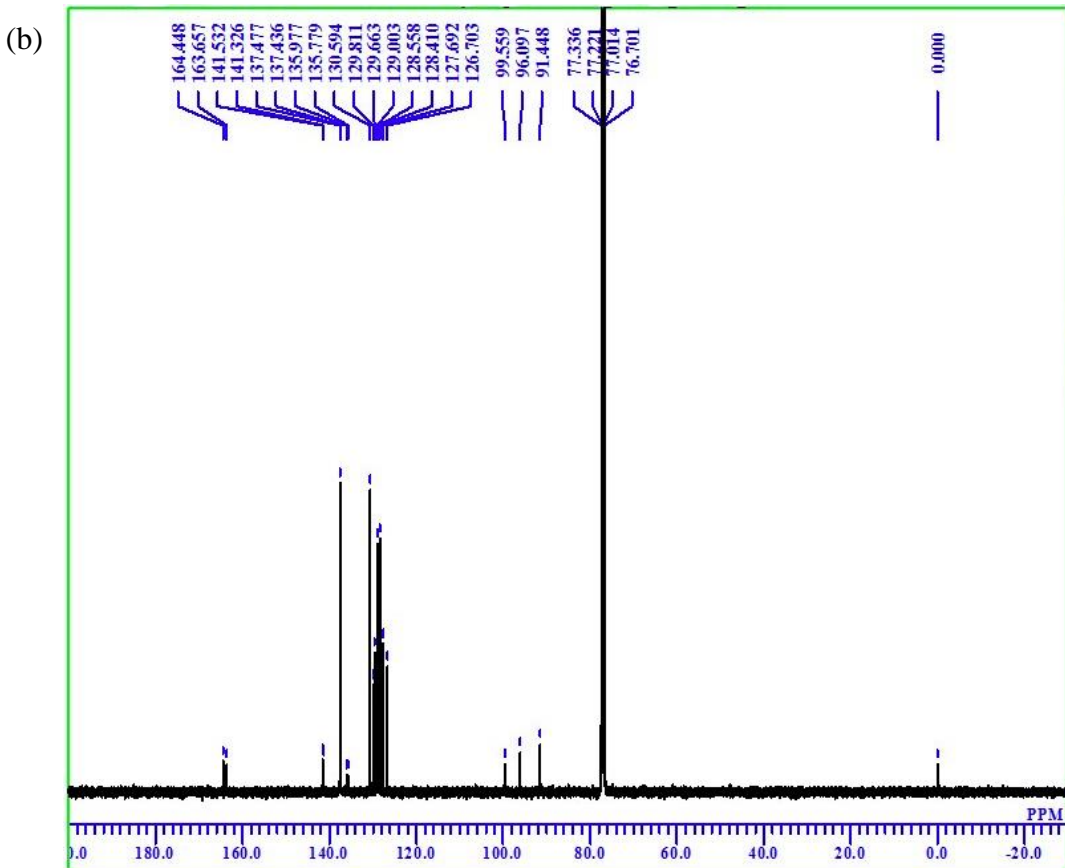



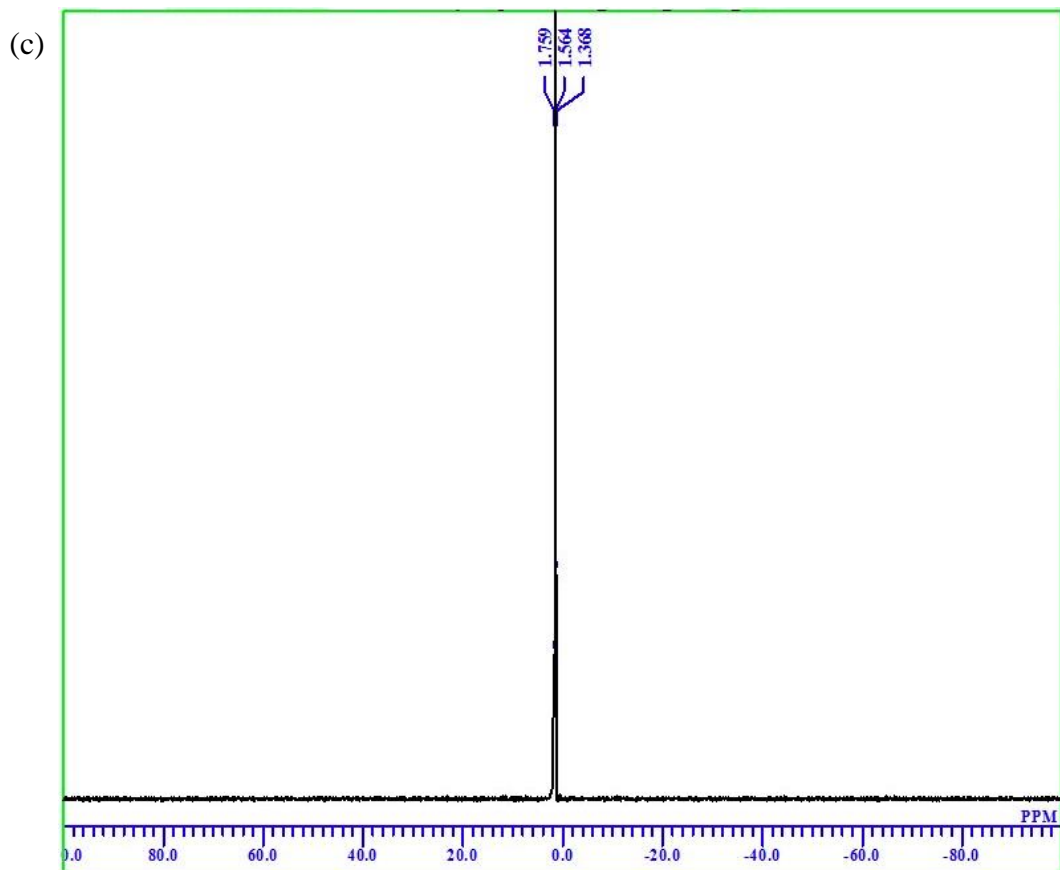

(d)

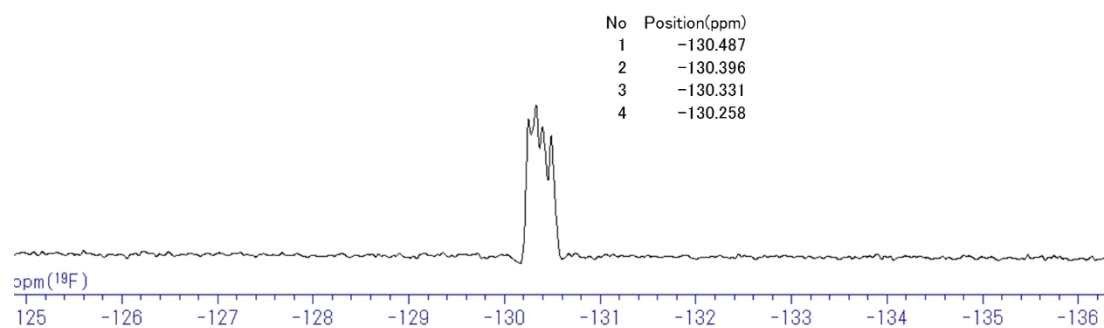

**Figure S3.** (a)  $^1\text{H}$ , (b)  $^{13}\text{C}$ , (c)  $^{11}\text{B}$  and (d)  $^{19}\text{F}$  NMR spectra of **4c** in  $\text{CDCl}_3$ .

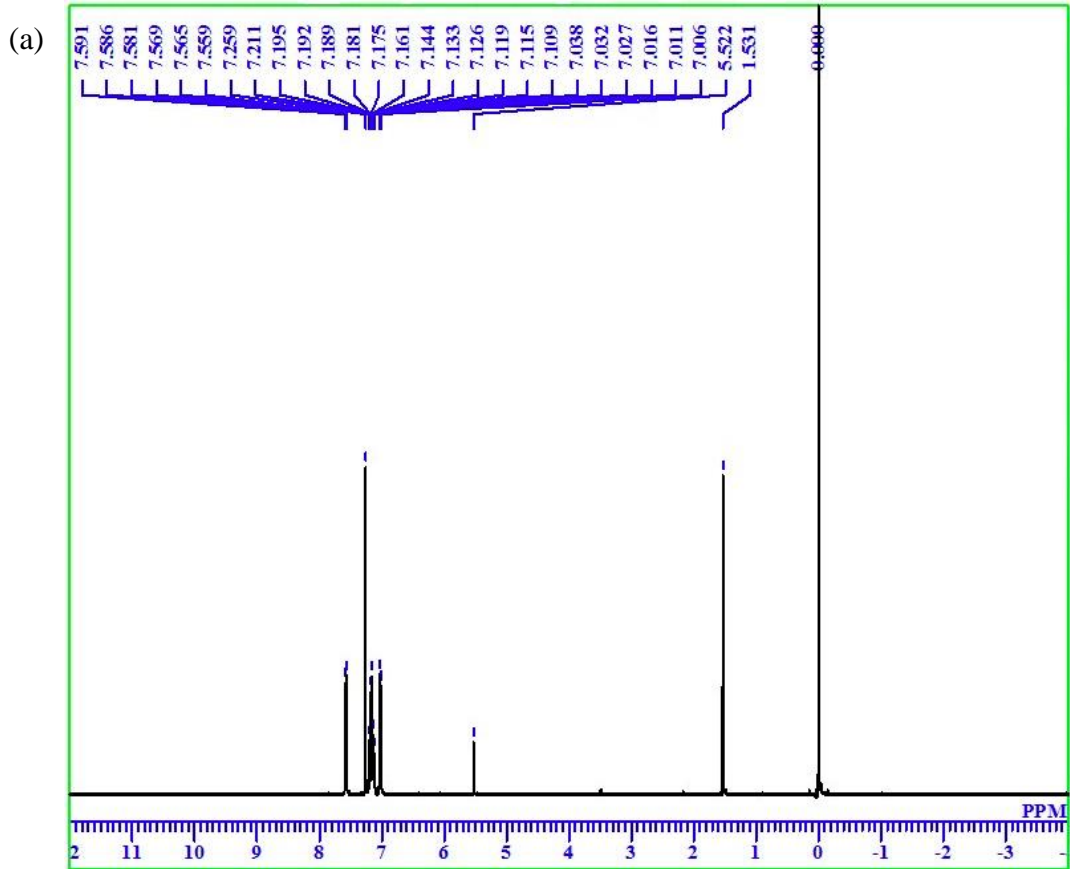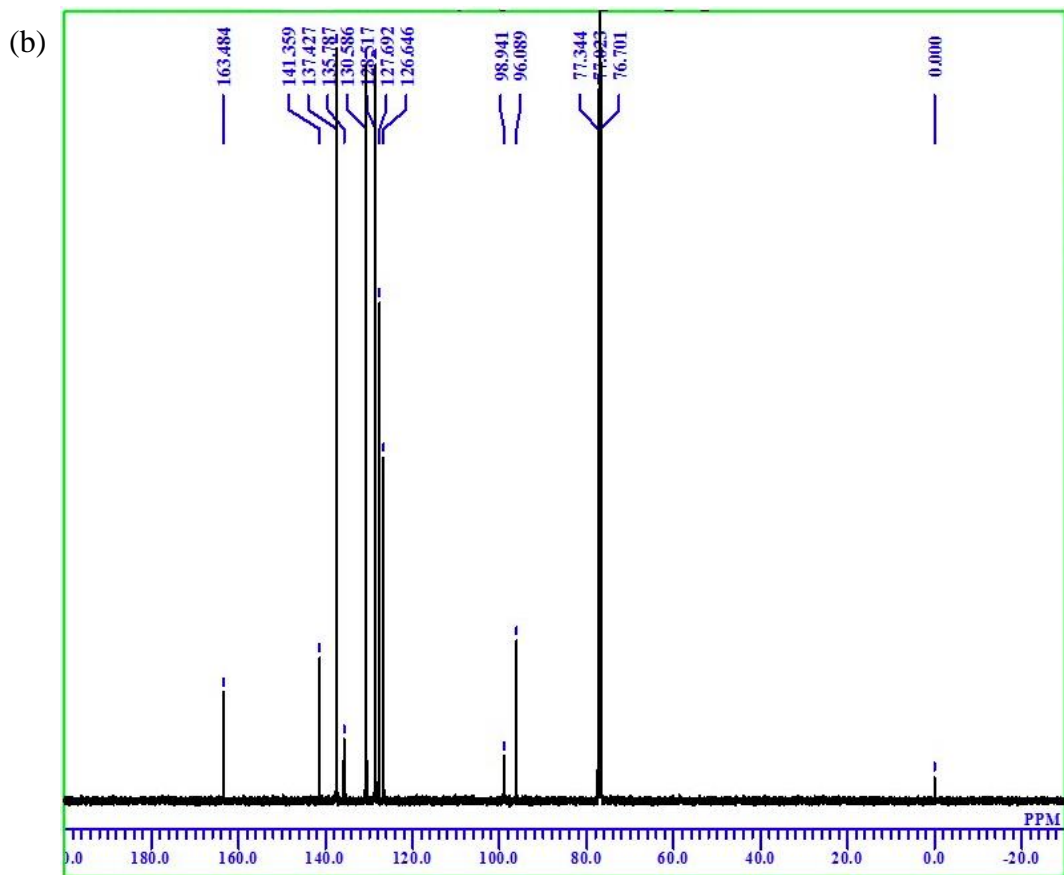

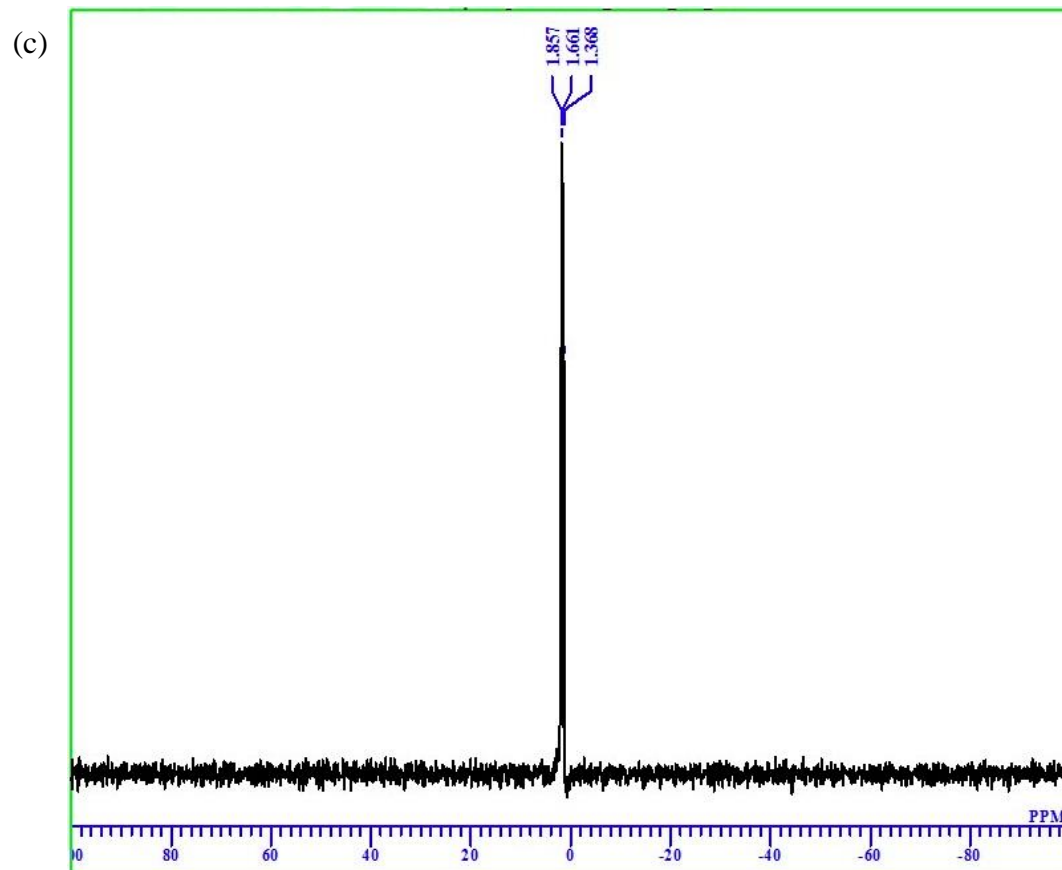

(d)

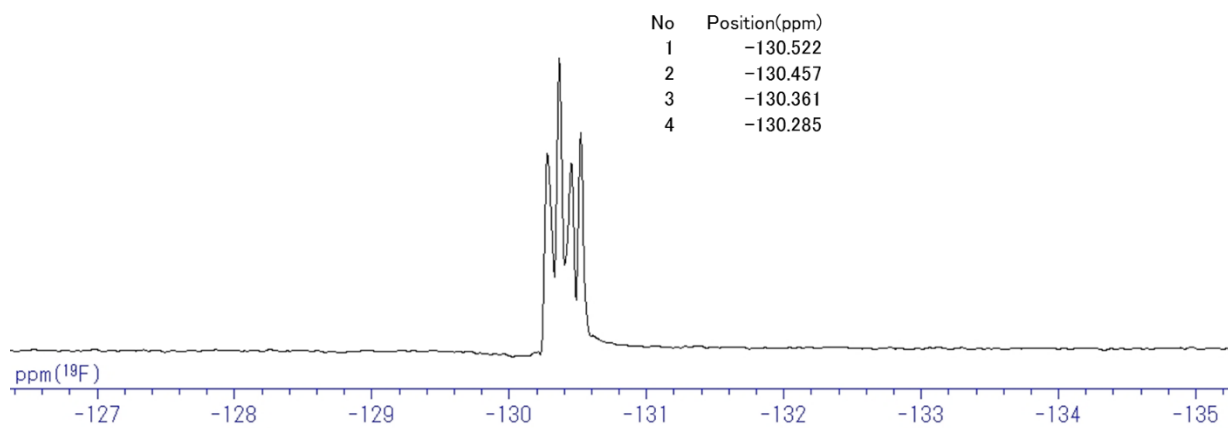

**Figure S4.** (a) <sup>1</sup>H, (b) <sup>13</sup>C, (c) <sup>11</sup>B and (d) <sup>19</sup>F NMR spectra of **4d** in CDCl<sub>3</sub>.

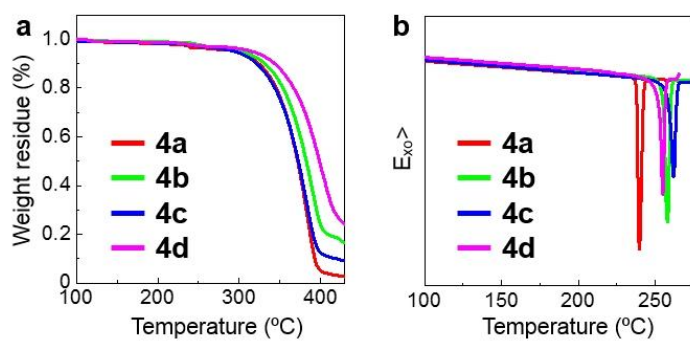

**Figure S5.** (a) TGA and (b) DSC profiles of **4**.

**Table S1.** Thermal properties of **4**

|           | $T_{d5}^a$ | $T_m^b$ |
|-----------|------------|---------|
| <b>4a</b> | 296        | 240     |
| <b>4b</b> | 304        | 258     |
| <b>4c</b> | 295        | 262     |
| <b>4d</b> | 316        | 255     |

<sup>a</sup>Decomposition temperature with 5% weight losses.

<sup>b</sup>Melting temperature.

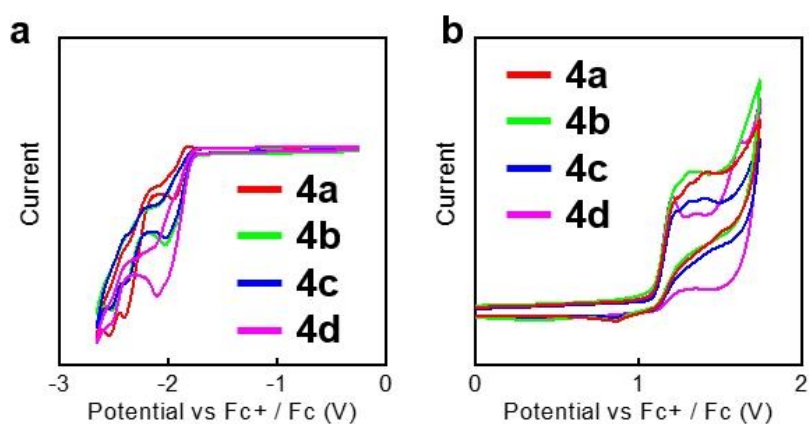

**Figure S6.** Cyclic voltammograms of **4** from (a) 0 V to -2.4 V and (b) 0 V to 1.2 V in dichloromethane ( $c = 1 \times 10^{-3}$  M) with 0.1 M  $\text{Bu}_4\text{NPF}_6$  as a supporting electrolyte,  $\text{AgCl}/\text{Ag}$  as a reference electrode, and Pt wire as working and counter electrodes, and scan rate at 100 mV/s.

**Table S2.** UV-vis absorption and electrochemical properties of **4**

|           | $\lambda_{\text{abs}}^a$ | $\epsilon^b$                      | $E_{\text{ox}}^{c,d}$ | $E_{\text{red}}^{c,e}$ | HOMO <sup>f</sup> | LUMO <sup>g</sup> |
|-----------|--------------------------|-----------------------------------|-----------------------|------------------------|-------------------|-------------------|
|           | [nm]                     | [ $\text{M}^{-1}\text{cm}^{-1}$ ] | [eV]                  | [V]                    | [eV]              | [eV]              |
| <b>4a</b> | 381                      | 28700                             | 1.09                  | -1.80                  | -5.89             | -3.00             |
| <b>4b</b> | 382                      | 23500                             | 1.09                  | -1.79                  | -5.89             | -3.01             |
| <b>4c</b> | 382                      | 24500                             | 1.09                  | -1.79                  | -5.89             | -3.01             |
| <b>4d</b> | 381                      | 26200                             | 1.09                  | -1.79                  | -5.89             | -3.01             |

<sup>a</sup> UV-vis spectra were measured in  $\text{CHCl}_3$  ( $1.0 \times 10^{-5}$  M). <sup>b</sup> Molar absorption coefficients of the absorption maxima at longer wavelength region. <sup>c</sup> CV measurements were carried out in  $\text{CH}_2\text{Cl}_2$  with 0.1 M  $\text{Bu}_4\text{NPF}_6$  as supporting electrolyte. <sup>d</sup>  $E_{\text{ox}}$  is the onset potential of first oxidation wave. <sup>e</sup>  $E_{\text{red}}$  is the onset potential of first reduction wave. <sup>f</sup> Calculated from the empirical formula,  $\text{HOMO} = -E_{\text{ox}} - 4.80$  (eV). <sup>g</sup> Calculated from the empirical formula,  $\text{LUMO} = -E_{\text{red}} - 4.80$  (eV).

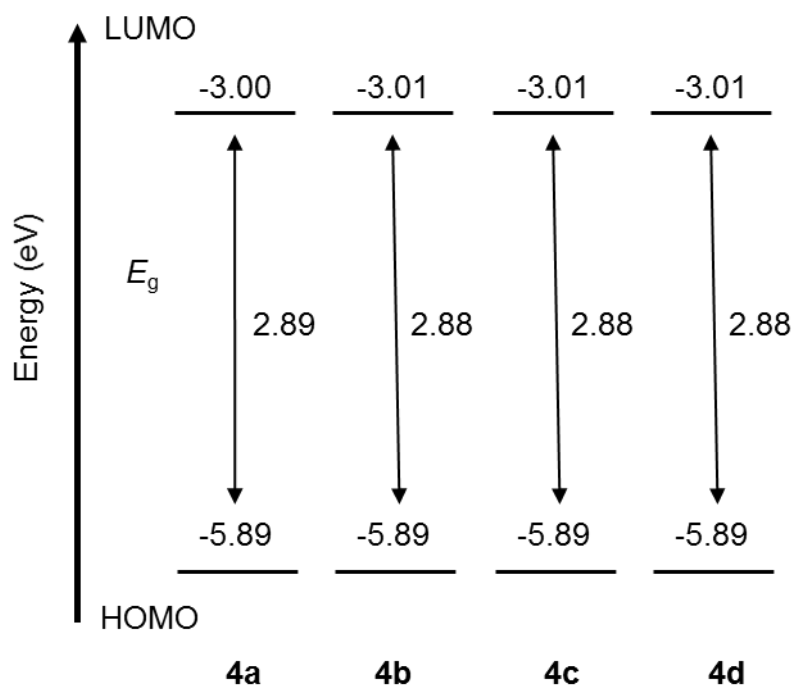

**Figure S7.** Energy diagrams of **4** calculated from the CV data.

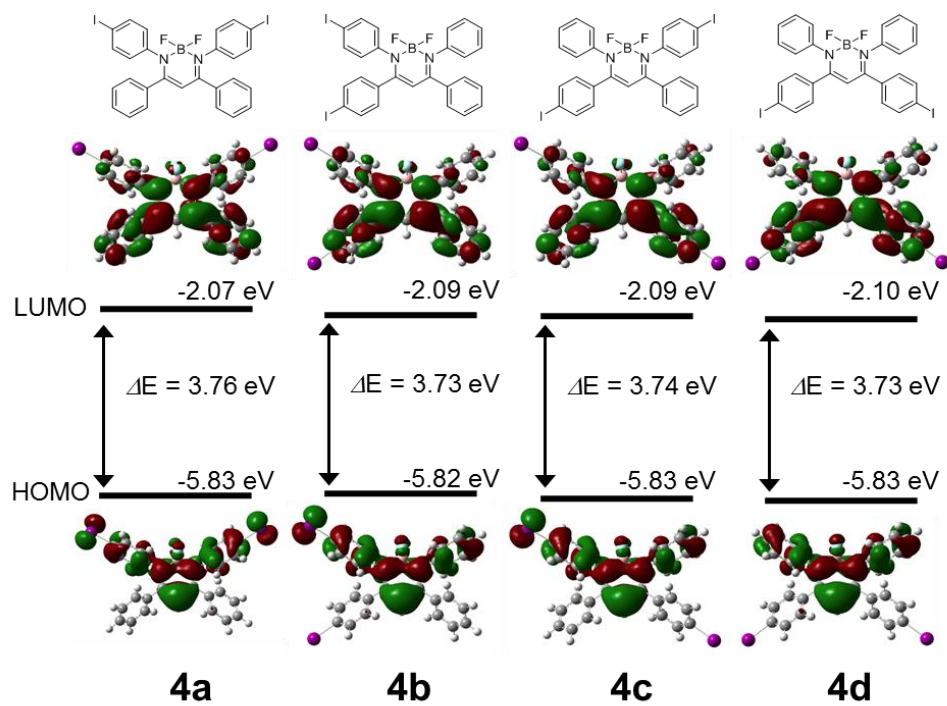

**Figure S8.** Structures and molecular orbital diagrams for LUMOs and HOMOs of **4** (B3LYP/6-31G (d))/B3LYP/6-31G (d)).

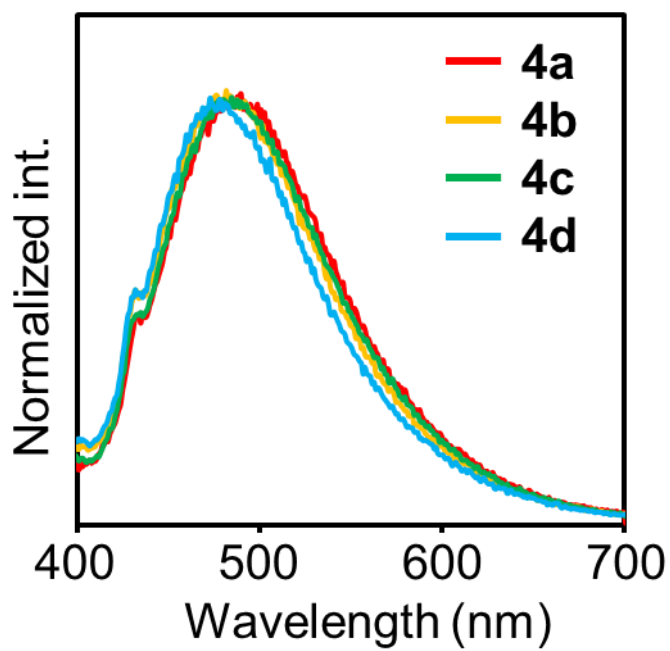

**Figure S9.** PL spectra of **4** in  $\text{CHCl}_3$  ( $1.0 \times 10^{-5}$ ).



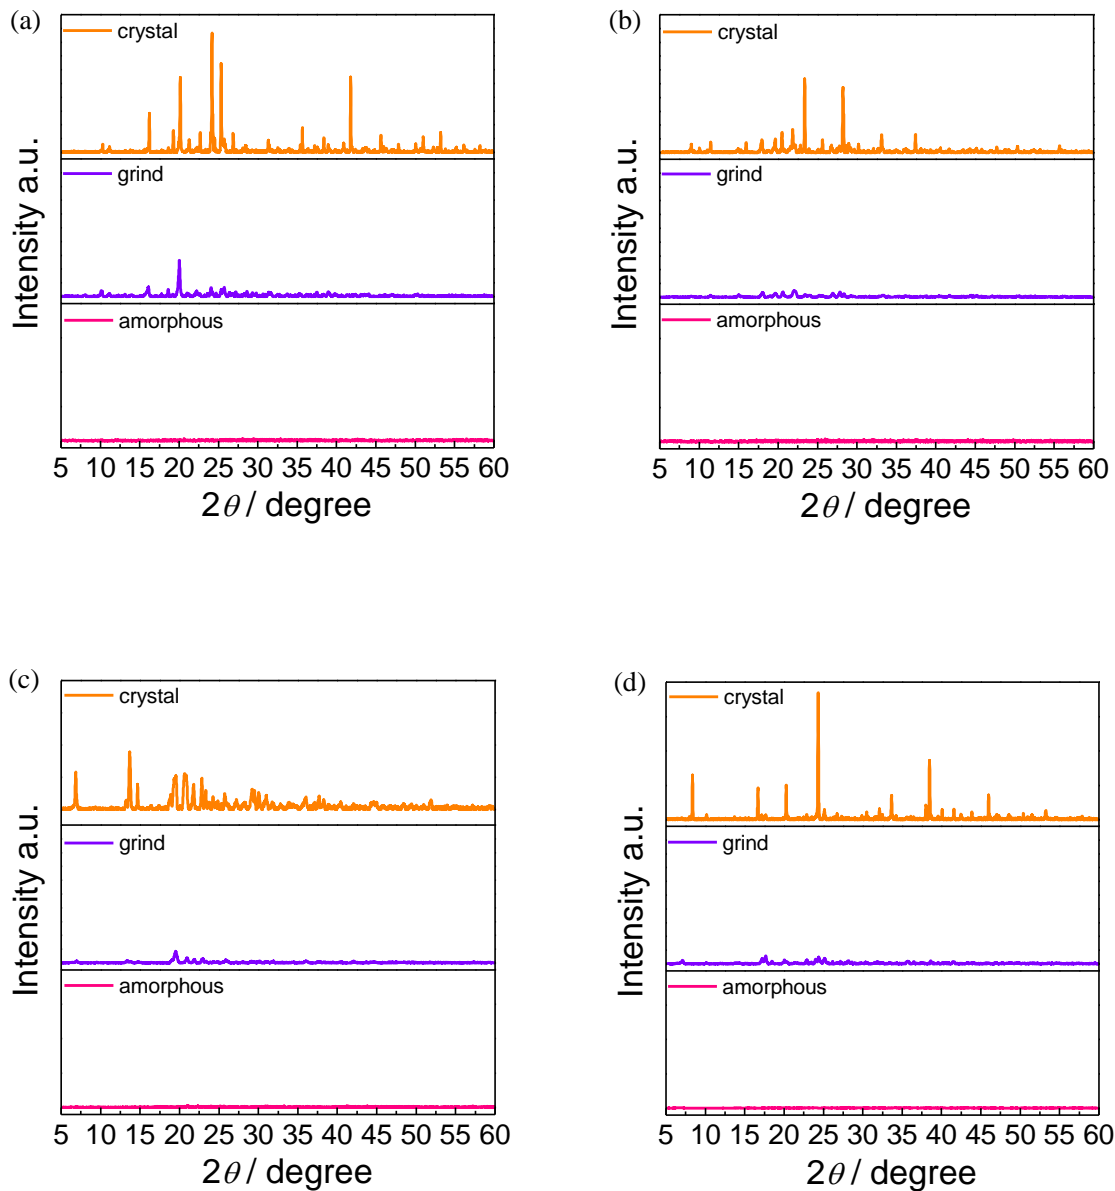

**Figure S10.** XRD patterns of (a) **4a**, (b) **4b**, (c) **4c**, and (d) **4d** in crystal, grind, and amorphous states.

**Table S3.** Crystallographic data of **4a<sup>a</sup>**

---

|                                                                  |                                                                                                                                    |
|------------------------------------------------------------------|------------------------------------------------------------------------------------------------------------------------------------|
| Empirical formula                                                | C <sub>27</sub> H <sub>19</sub> BF <sub>2</sub> I <sub>2</sub> N <sub>2</sub>                                                      |
| Formula weight                                                   | 674.05                                                                                                                             |
| Temperature (K)                                                  | 93(2)                                                                                                                              |
| Wavelength (Å)                                                   | 0.71075                                                                                                                            |
| Crystal system, space group                                      | monoclinic, <i>P</i> 2 <sub>1</sub> / <i>n</i>                                                                                     |
| Unit cell dimensions                                             | <i>a</i> = 9.8811(8)<br><i>b</i> = 21.9613(11)<br><i>c</i> = 11.8955(7)<br><i>α</i> = 90<br><i>β</i> = 106.396(7)<br><i>γ</i> = 90 |
| <i>V</i> (Å <sup>3</sup> )                                       | 2476.4(3)                                                                                                                          |
| Z, calculated density (Mg m <sup>-3</sup> )                      | 4, 1.808                                                                                                                           |
| Absorption coefficient                                           | 2.573                                                                                                                              |
| <i>F</i> (000)                                                   | 1296                                                                                                                               |
| Crystal size (mm)                                                | 0.10 × 0.10 × 0.10                                                                                                                 |
| <i>θ</i> range for data collection                               | 3.01 –27.48                                                                                                                        |
| Limiting indices                                                 | –12 ≤ <i>h</i> ≤ 12, –28 ≤ <i>k</i> ≤ 28, –15 ≤ <i>l</i> ≤ 15                                                                      |
| Reflections collected (unique)                                   | 23042/5674 [ <i>R</i> (int) = 0.0399]                                                                                              |
| Completeness to theta = 27.48                                    | 0.999                                                                                                                              |
| Goodness-of-fit on <i>F</i> <sup>2</sup>                         | 0.923                                                                                                                              |
| Final <i>R</i> indices [ <i>I</i> > 2σ( <i>I</i> )] <sup>b</sup> | <i>R</i> <sub>1</sub> = 0.0347, w <i>R</i> <sub>2</sub> = 0.1108                                                                   |
| <i>R</i> indices (all data)                                      | <i>R</i> <sub>1</sub> = 0.0402, w <i>R</i> <sub>2</sub> = 0.1159                                                                   |

---

<sup>a</sup> The structures were solved by direct method (SIR97)<sup>[9]</sup> and refined by full-matrix least-squares procedures based on *F*<sup>2</sup> (SHELX-97).<sup>[10]</sup> <sup>b</sup> *R*<sub>1</sub> = Σ(|*F*<sub>0</sub> – *F*<sub>c</sub>|)/Σ|*F*<sub>0</sub>|. w*R*<sub>2</sub> = [Σw(*F*<sub>0</sub><sup>2</sup> – *F*<sub>c</sub><sup>2</sup>)/Σw(*F*<sub>0</sub><sup>2</sup>)<sup>2</sup>]<sup>1/2</sup>. w

$$= 1/[\sigma^2(F^2_0)+[(ap)^2+bp]], \text{ where } p = [\max(F^2_0,0)+2F^2_c]/3.$$

**Table S4.** Crystallographic data of **4b**<sup>a</sup>

|                                                                  |                                                                                                                                                 |
|------------------------------------------------------------------|-------------------------------------------------------------------------------------------------------------------------------------------------|
| Empirical formula                                                | C <sub>27</sub> H <sub>19</sub> BF <sub>2</sub> I <sub>2</sub> N <sub>2</sub>                                                                   |
| Formula weight                                                   | 674.05                                                                                                                                          |
| Temperature (K)                                                  | 93(2)                                                                                                                                           |
| Wavelength (Å)                                                   | 0.71075                                                                                                                                         |
| Crystal system, space group                                      | triclinic, <i>P</i> -1                                                                                                                          |
| Unit cell dimensions                                             | <i>a</i> = 10.1509(19)<br><i>b</i> = 10.2761(19)<br><i>c</i> = 13.098(2)<br>$\alpha$ = 73.482(5)<br>$\beta$ = 71.610(5)<br>$\gamma$ = 76.301(5) |
| <i>V</i> (Å <sup>3</sup> )                                       | 1226.7(4)                                                                                                                                       |
| <i>Z</i> , calculated density (Mg m <sup>-3</sup> )              | 2, 1.825                                                                                                                                        |
| Absorption coefficient                                           | 2.597                                                                                                                                           |
| <i>F</i> (000)                                                   | 648                                                                                                                                             |
| Crystal size (mm)                                                | 0.10 × 0.10 × 0.10                                                                                                                              |
| $\theta$ range for data collection                               | 3.06 –27.48                                                                                                                                     |
| Limiting indices                                                 | -13 ≤ <i>h</i> ≤ 13, -13 ≤ <i>k</i> ≤ 13, -16 ≤ <i>l</i> ≤ 16                                                                                   |
| Reflections collected (unique)                                   | 11928/5587 [ <i>R</i> (int) = 0.0782]                                                                                                           |
| Completeness to theta = 27.48                                    | 0.992                                                                                                                                           |
| Goodness-of-fit on <i>F</i> <sup>2</sup>                         | 1.031                                                                                                                                           |
| Final <i>R</i> indices [ <i>I</i> > 2σ( <i>I</i> )] <sup>b</sup> | <i>R</i> <sub>1</sub> = 0.0441, w <i>R</i> <sub>2</sub> = 0.1352                                                                                |
| <i>R</i> indices (all data)                                      | <i>R</i> <sub>1</sub> = 0.0549, w <i>R</i> <sub>2</sub> = 0.1506                                                                                |

<sup>a</sup> The structures were solved by direct method (SIR97)<sup>[9]</sup> and refined by full-matrix least-squares procedures based on *F*<sup>2</sup> (SHELX-97).<sup>[10]</sup> <sup>b</sup>  $R_1 = \Sigma(|F_0|-|F_c|)/\Sigma|F_0|$ .  $wR_2 = [\Sigma w(F^2_0-F^2_c)^2/\Sigma w(F^2_0)^2]^{1/2}$ . *w*

$$= 1/[\sigma^2(F^2_0)+[(ap)^2+bp]], \text{ where } p = [\max(F^2_0,0)+2F^2_c]/3.$$

**Table S5.** Crystallographic data of **4c<sup>a</sup>**

|                                                                  |                                                                                                                                             |
|------------------------------------------------------------------|---------------------------------------------------------------------------------------------------------------------------------------------|
| Empirical formula                                                | C <sub>27</sub> H <sub>19</sub> BF <sub>2</sub> I <sub>2</sub> N <sub>2</sub>                                                               |
| Formula weight                                                   | 674.05                                                                                                                                      |
| Temperature (K)                                                  | 93(2)                                                                                                                                       |
| Wavelength (Å)                                                   | 0.71075                                                                                                                                     |
| Crystal system, space group                                      | triclinic, <i>P</i> -1                                                                                                                      |
| Unit cell dimensions                                             | <i>a</i> = 9.714(2)<br><i>b</i> = 10.007(2)<br><i>c</i> = 13.415(3)<br>$\alpha$ = 104.363(7)<br>$\beta$ = 99.942(7)<br>$\gamma$ = 99.426(7) |
| <i>V</i> (Å <sup>3</sup> )                                       | 1214.8(5)                                                                                                                                   |
| Z, calculated density (Mg m <sup>-3</sup> )                      | 2, 1.843                                                                                                                                    |
| Absorption coefficient                                           | 2.623                                                                                                                                       |
| <i>F</i> (000)                                                   | 648                                                                                                                                         |
| Crystal size (mm)                                                | 0.10 × 0.10 × 0.10                                                                                                                          |
| $\theta$ range for data collection                               | 3.03 –27.48                                                                                                                                 |
| Limiting indices                                                 | -12 ≤ <i>h</i> ≤ 12, -12 ≤ <i>k</i> ≤ 11, -17 ≤ <i>l</i> ≤ 17                                                                               |
| Reflections collected (unique)                                   | 11188/5505 [ <i>R</i> (int) = 0.1166]                                                                                                       |
| Completeness to $\theta$ = 27.48                                 | 0.989                                                                                                                                       |
| Goodness-of-fit on <i>F</i> <sup>2</sup>                         | 1.187                                                                                                                                       |
| Final <i>R</i> indices [ <i>I</i> > 2σ( <i>I</i> )] <sup>b</sup> | <i>R</i> <sub>1</sub> = 0.0810, w <i>R</i> <sub>2</sub> = 0.2002                                                                            |
| <i>R</i> indices (all data)                                      | <i>R</i> <sub>1</sub> = 0.1048, w <i>R</i> <sub>2</sub> = 0.2198                                                                            |

<sup>a</sup> The structures were solved by direct method (SIR97)<sup>[9]</sup> and refined by full-matrix least-squares procedures based on *F*<sup>2</sup> (SHELX-97).<sup>[10]</sup> <sup>b</sup>  $R_1 = \Sigma(|F_0| - |F_c|) / \Sigma|F_0|$ .  $wR_2 = [\Sigma w(F^2_0 - F^2_c)^2 / \Sigma w(F^2_0)^2]^{1/2}$ . *w*

$$= 1/[\sigma^2(F^2_0)+[(ap)^2+bp]], \text{ where } p = [\max(F^2_0,0)+2F^2_c]/3.$$

**Table S6.** Crystallographic data of **4d**<sup>a</sup>

|                                                                  |                                                                                                                                   |
|------------------------------------------------------------------|-----------------------------------------------------------------------------------------------------------------------------------|
| Empirical formula                                                | C <sub>27</sub> H <sub>19</sub> BF <sub>2</sub> I <sub>2</sub> N <sub>2</sub>                                                     |
| Formula weight                                                   | 674.05                                                                                                                            |
| Temperature (K)                                                  | 93(2)                                                                                                                             |
| Wavelength (Å)                                                   | 0.71075                                                                                                                           |
| Crystal system, space group                                      | monoclinic, <i>P</i> 2 <sub>1</sub> / <i>c</i>                                                                                    |
| Unit cell dimensions                                             | <i>a</i> = 7.4834(8)<br><i>b</i> = 20.9614(19)<br><i>c</i> = 15.6517(15)<br>$\alpha$ = 90<br>$\beta$ = 94.901(7)<br>$\gamma$ = 90 |
| <i>V</i> (Å <sup>3</sup> )                                       | 2446.2(4)                                                                                                                         |
| <i>Z</i> , calculated density (Mg m <sup>-3</sup> )              | 4, 1.830                                                                                                                          |
| Absorption coefficient                                           | 2.605                                                                                                                             |
| <i>F</i> (000)                                                   | 1296                                                                                                                              |
| Crystal size (mm)                                                | 0.10 × 0.10 × 0.10                                                                                                                |
| $\theta$ range for data collection                               | 3.08 –27.45                                                                                                                       |
| Limiting indices                                                 | –9 ≤ <i>h</i> ≤ 9, –27 ≤ <i>k</i> ≤ 26, –15 ≤ <i>l</i> ≤ 20                                                                       |
| Reflections collected (unique)                                   | 22048/5559 [ <i>R</i> (int) = 0.0699]                                                                                             |
| Completeness to theta = 27.48                                    | 0.995                                                                                                                             |
| Goodness-of-fit on <i>F</i> <sup>2</sup>                         | 1.003                                                                                                                             |
| Final <i>R</i> indices [ <i>I</i> > 2σ( <i>I</i> )] <sup>b</sup> | <i>R</i> <sub>1</sub> = 0.0477, w <i>R</i> <sub>2</sub> = 0.1377                                                                  |
| <i>R</i> indices (all data)                                      | <i>R</i> <sub>1</sub> = 0.0597, w <i>R</i> <sub>2</sub> = 0.1496                                                                  |

<sup>a</sup> The structures were solved by direct method (SIR97)<sup>[9]</sup> and refined by full-matrix least-squares procedures based on *F*<sup>2</sup> (SHELX-97).<sup>[10]</sup> <sup>b</sup>  $R_1 = \Sigma(|F_0| - |F_c|) / \Sigma|F_0|$ .  $wR_2 = [\Sigma w(F^2_0 - F^2_c)^2 / \Sigma w(F^2_0)^2]^{1/2}$ .  $w = 1/[\sigma^2(F^2_0)+[(ap)^2+bp]]$ , where  $p = [\max(F^2_0,0)+2F^2_c]/3$ .

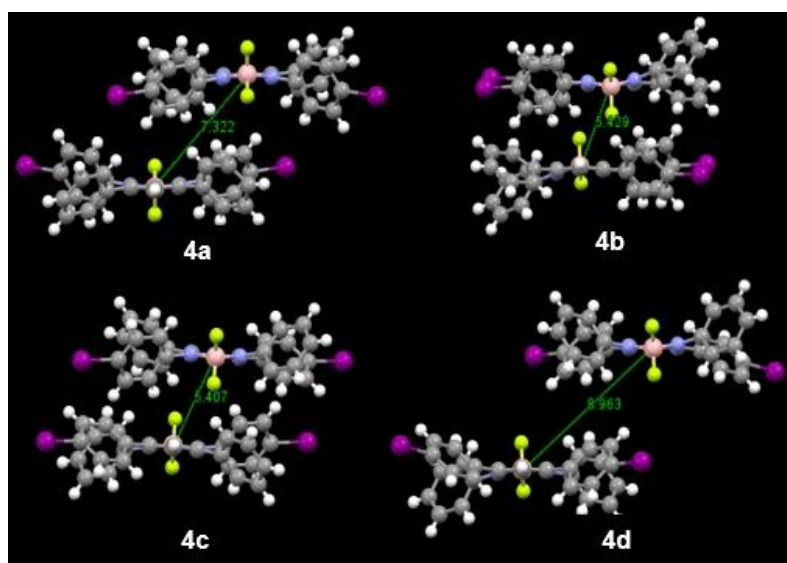

**Figure S11.** Packing structures of **4**.

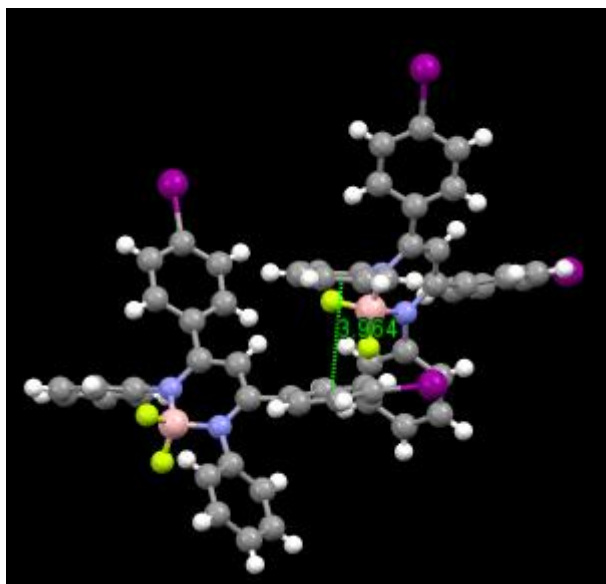

**Figure S12.** Packing structure of **4d**.

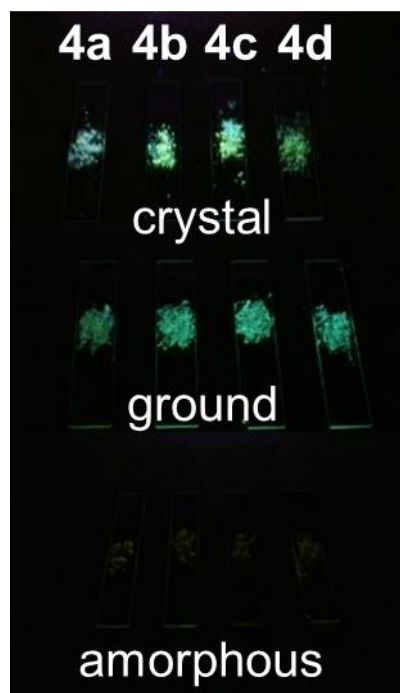

**Figure S13.** Appearances of the powder samples under UV irradiation (365 nm).



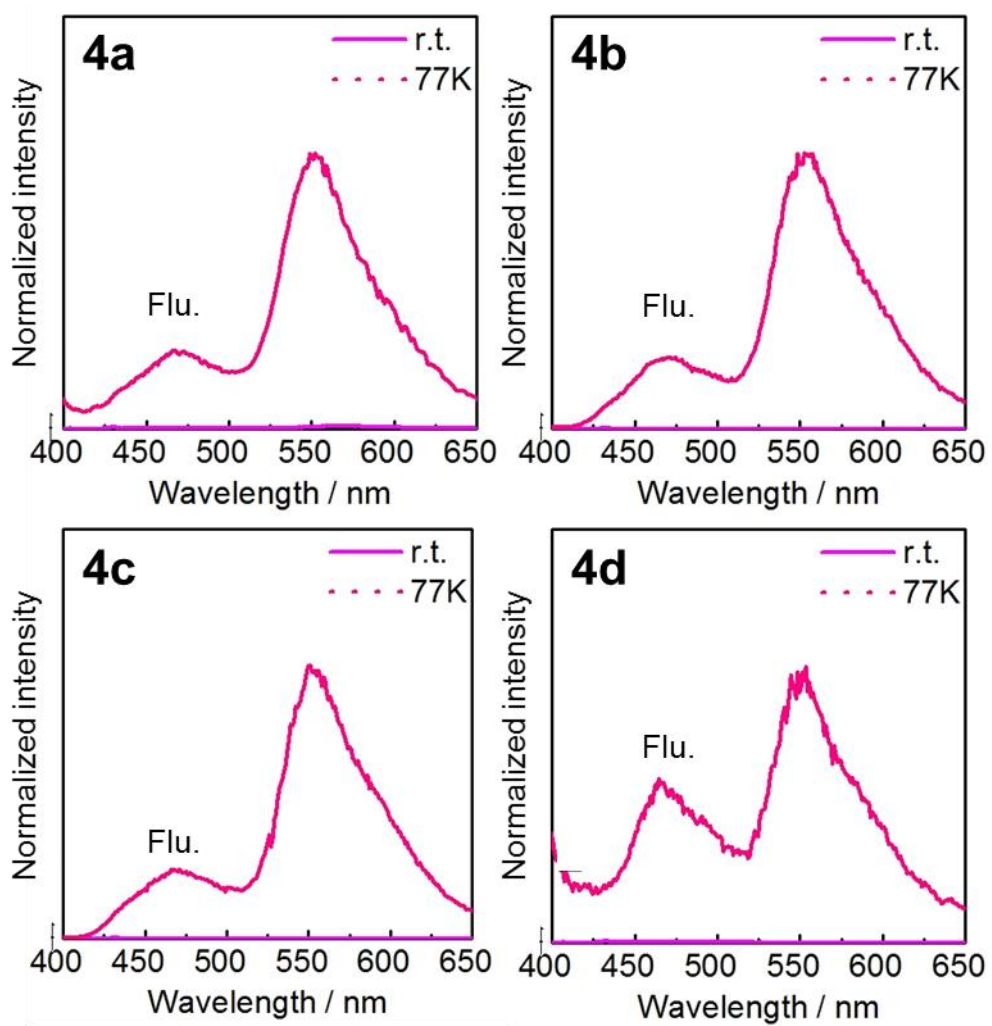

**Figure S14.** PL spectra of boron diiminates in 2-methyl THF at room temperature and 77 K.
